# Supplementary material
Source: PubMed Central journal article supplement (PMC3436162)
Supplement: supp_M112.344192_jbc.M112.344192-4.pdf [file supp_M112.344192_jbc.M112.344192-4.pdf]

### Supplemental Data. Figure S4

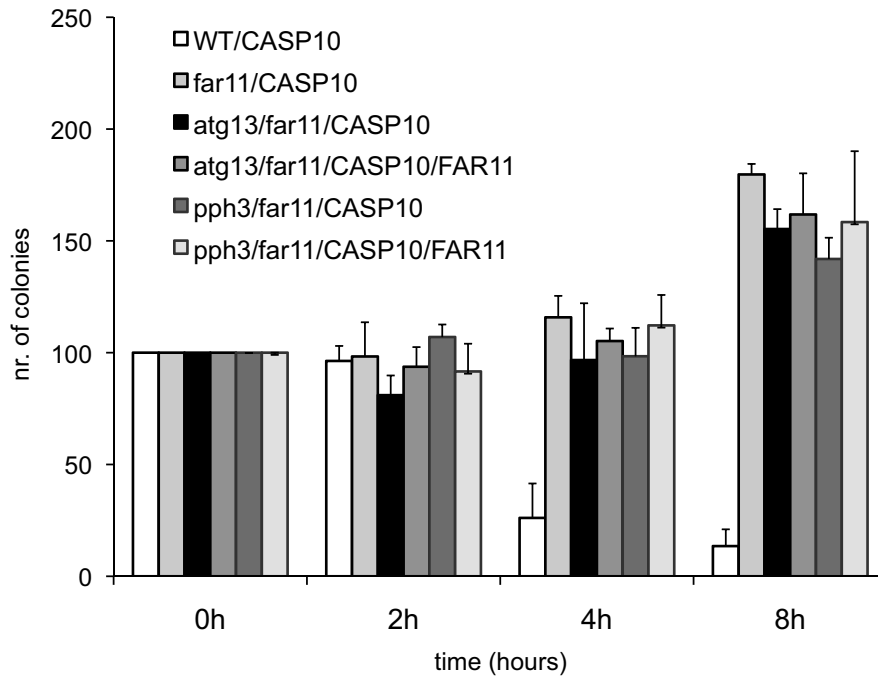

Figure S4. Far11 functions upstream of Atg13 and Pph3 in the caspase-10 signaling in *S. cerevisiae*. Clonogenic assay of the yeast strains *far11* $\Delta$ , *atg13* $\Delta$  and *far11* $\Delta$ , *pph3* $\Delta$  expressing human *CASP10* and an episomic copy of *FAR11*. Data are presented as percentages of surviving colonies as referred to non-inducing conditions.
