# Supplementary material
Source: PubMed Central journal article supplement (PMC3436162)
Supplement: supp_M112.344192_jbc.M112.344192-6.pdf [file supp_M112.344192_jbc.M112.344192-6.pdf]

**Table S2. List of plasmids used in the study.**

| <b><i>Plasmid</i></b>       | <b><i>Description</i></b>                             | <b><i>Source</i></b> |
|-----------------------------|-------------------------------------------------------|----------------------|
| pESC-URA                    | Episomic, <i>URA3</i> marker, GAL-inducible           | Stratagene           |
| pESC-URA- <i>CASP10</i>     | Episomic, <i>URA3</i> marker, <i>pGAL1-CASP10</i>     | This study           |
| pGILDA                      | Episomic, <i>HIS3</i> marker, GAL-inducible           | Clontech             |
| pGILDA- <i>CASP10</i>       | Episomic, <i>HIS3</i> marker, <i>pGAL1-CASP10</i>     | This study           |
| YCpLac111                   | Centromeric, <i>LEU2</i> marker                       | Stratagene           |
| YCpLac111- <i>FAR11</i>     | Centromeric, <i>LEU2</i> marker, <i>pFAR11-FAR11</i>  | This study           |
| YCpLac111- <i>FAM40A</i>    | Centromeric, <i>LEU2</i> marker, <i>pFAR11-FAM40A</i> | This study           |
| YCpLac111- <i>FAM40B</i>    | Centromeric, <i>LEU2</i> marker, <i>pFAR11-FAM40B</i> | This study           |
| pKT102                      | pFA6a-link-yECFP- <i>KanMX6</i>                       | M. A. Sheff          |
| pKT103                      | pFA6a-link-yEVENUS- <i>KanMX6</i>                     | M. A. Sheff          |
| pKT127                      | pFA6a-link-yEGFP- <i>KanMX6</i>                       | M. A. Sheff          |
| YCpLac22- <i>FUS3</i> -GFP  | Centromeric, <i>TRP1</i> marker, <i>FUS3</i> -GFP     | D. E. Stone          |
| YCpLac111- <i>FUS3</i> -GFP | Centromeric, <i>LEU2</i> marker, <i>FUS3</i> -GFP     | This study           |
| pRS315- <i>ATG13</i> -HA    | Centromeric, <i>LEU2</i> marker, <i>ATG13</i> -HA     | D. Klionsky          |
| pUG36- <i>ATG8</i> -GFP     | Centromeric, <i>URA3</i> marker, <i>ATG8</i> -GFP     | F. Madeo             |
| pXN-gate                    | Centromeric, <i>TRP1</i> marker                       | P. Orbdlik           |
| pMetYCgate                  | Centromeric, <i>LEU2</i> marker                       | P. Orbdlik           |
| pJR3278                     | pFA6a-VN-YFP- <i>TRP1</i>                             | Our lab stock        |
| pJR3281                     | pFA6a-VC-YFP- <i>KanMX6</i>                           | Our lab stock        |
