# Supplementary material
Source: PubMed Central journal article supplement (PMC3436162)
Supplement: supp_M112.344192_jbc.M112.344192-8.pdf [file supp_M112.344192_jbc.M112.344192-8.pdf]

**Table S4. Name and description of the genes identified that are essential for caspase-10-induced toxicity.**

| <i>ORF</i>     | <i>Name</i>  | <i>SGD description</i>                                                                                                                                                         | <i>No. of suppressors identified</i> |
|----------------|--------------|--------------------------------------------------------------------------------------------------------------------------------------------------------------------------------|--------------------------------------|
| <i>YHR005C</i> | <i>GPA1</i>  | GTP-binding alpha subunit of the heterotrimeric G protein that couples to pheromone receptors.                                                                                 | 2                                    |
| <i>YDL159W</i> | <i>STE7</i>  | Signal transducing MAP kinase kinase involved in pheromone response.                                                                                                           | 3                                    |
| <i>YLR362W</i> | <i>STE11</i> | Signal transducing MEK kinase involved in pheromone response and pseudohyphal/invasive growth pathways.                                                                        | 1                                    |
| <i>YHL007C</i> | <i>STE20</i> | Cdc42p-activated signal transducing kinase of the PAK (p21-activated kinase) family, involved in pheromone response, pseudohyphal/invasive growth, and vacuole inheritance.    | 3                                    |
| <i>YBL016W</i> | <i>FUS3</i>  | Mitogen-activated serine/threonine protein kinase involved in mating.                                                                                                          | 2                                    |
| <i>YGR040W</i> | <i>KSS1</i>  | Mitogen-activated protein kinase (MAPK) involved in signal transduction pathways that control filamentous growth and pheromone response.                                       | 5                                    |
| <i>YHR030C</i> | <i>SLT2</i>  | Serine/threonine MAP kinase involved in regulating the maintenance of cell wall integrity and progression through the cell cycle.                                              | 2                                    |
| <i>YDL134C</i> | <i>PPH21</i> | Catalytic subunit of protein phosphatase 2A (PP2A), functionally redundant with Pph22p.                                                                                        | 4                                    |
| <i>YDL188C</i> | <i>PPH22</i> | Same as <i>PPH21</i> .                                                                                                                                                         | 1                                    |
| <i>YDR075W</i> | <i>PPH3</i>  | Catalytic subunit of an evolutionarily conserved protein phosphatase complex containing Psy2p and the regulatory subunit Psy4p.                                                | 3                                    |
| <i>YER089C</i> | <i>PTC2</i>  | Type 2C protein phosphatase; dephosphorylates Hog1p to limit maximal osmopressure induced kinase activity.                                                                     | 1                                    |
| <i>YBL056W</i> | <i>PTC3</i>  | Same as <i>PTC2</i> .                                                                                                                                                          | 1                                    |
| <i>YJL164C</i> | <i>TPK1</i>  | cAMP-dependent protein kinase catalytic subunit.                                                                                                                               | 1                                    |
| <i>YPL203W</i> | <i>TPK2</i>  | cAMP-dependent protein kinase catalytic subunit.                                                                                                                               | 2                                    |
| <i>YKL166C</i> | <i>TPK3</i>  | cAMP-dependent protein kinase catalytic subunit.                                                                                                                               | 1                                    |
| <i>YMR052W</i> | <i>FAR3</i>  | Protein involved in recovery from cell cycle arrest in response to pheromone.                                                                                                  | 2                                    |
| <i>YFR008W</i> | <i>FAR7</i>  | Protein involved in recovery from cell cycle arrest in response to pheromone.                                                                                                  | 1                                    |
| <i>YMR029C</i> | <i>FAR8</i>  | Protein involved in recovery from cell cycle arrest in response to pheromone.                                                                                                  | 1                                    |
| <i>YDR200C</i> | <i>FAR9</i>  | Protein required for cytoplasm to vacuole targeting of proteins; forms a complex with Far3p and Far7p to Far11p involved in recovery from pheromone-induced cell cycle arrest. | 3                                    |
| <i>YLR238W</i> | <i>FAR10</i> | Protein involved in recovery from cell cycle arrest in response to pheromone.                                                                                                  | 2                                    |
| <i>YNL127W</i> | <i>FAR11</i> | Protein involved in recovery from cell cycle arrest in response to pheromone.                                                                                                  | 6                                    |
|                |              |                                                                                                                                                                                | 1                                    |

|                |               |                                                                                                                          |   |
|----------------|---------------|--------------------------------------------------------------------------------------------------------------------------|---|
| <i>YGL180W</i> | <i>ATG1</i>   | Protein ser/thr kinase required for vesicle formation in autophagy and the cytoplasm-to-vacuole targeting (Cvt) pathway. | 3 |
| <i>YNL223W</i> | <i>ATG4</i>   | Conserved cysteine protease required for autophagy.                                                                      | 2 |
| <i>YPL120W</i> | <i>ATG6</i>   | Subunit of phosphatidylinositol (PtdIns) 3-kinase complexes I and II.                                                    | 1 |
| <i>YBL078C</i> | <i>ATG8</i>   | Component of autophagosomes and Cvt vesicles.                                                                            | 1 |
| <i>YPR185W</i> | <i>ATG13</i>  | Regulatory subunit of the Atg1p signaling complex.                                                                       | 2 |
| <i>YMR037C</i> | <i>MSN2</i>   | Transcriptional activator related to Msn4p; activated in stress conditions.                                              | 1 |
| <i>YER040W</i> | <i>GLN3</i>   | Transcriptional activator of genes regulated by nitrogen catabolite repression (NCR).                                    | 1 |
| <i>YIL130W</i> | <i>ASG1</i>   | Zinc cluster protein proposed to function as a transcriptional regulator involved in the stress response.                | 2 |
| <i>YPL248C</i> | <i>GAL4</i>   | Transcription factor required for the activation of the GAL genes in response to galactose.                              | 5 |
| <i>YDR443C</i> | <i>SSN2</i>   | Subunit of the RNA polymerase II mediator complex.                                                                       | 1 |
| <i>YDL093W</i> | <i>PMT5</i>   | Protein O-mannosyltransferase.                                                                                           | 1 |
| <i>YIR002C</i> | <i>MPH1</i>   | Member of the DEAH family of helicases.                                                                                  | 1 |
| <i>YIL030C</i> | <i>SSM4</i>   | Ubiquitin-protein ligase involved in ER-associated protein degradation.                                                  | 2 |
| <i>YML068W</i> | <i>ITT1</i>   | Protein that modulates the efficiency of translation termination.                                                        | 1 |
| <i>YDR001C</i> | <i>NTH1</i>   | Neutral trehalase.                                                                                                       | 1 |
| <i>YLL049W</i> | <i>LDB18</i>  | Protein of unknown function; required for nuclear migration.                                                             | 1 |
| <i>YNL197C</i> | <i>WHI3</i>   | RNA binding protein that sequesters CLN3 mRNA in cytoplasmic foci.                                                       | 2 |
| <i>YPL079W</i> | <i>RPL21B</i> | Protein component of the large (60S) ribosomal subunit.                                                                  | 1 |
| <i>YLR368W</i> | <i>MDM30</i>  | F-box protein.                                                                                                           | 1 |
| <i>YOR198C</i> | <i>BFR1</i>   | Component of mRNP complexes associated with polyribosomes.                                                               | 1 |
| <i>YOR130C</i> | <i>ORT1</i>   | Ornithine transporter of the mitochondrial inner membrane.                                                               | 1 |
| <i>YKL096W</i> | <i>CWP1</i>   | Cell wall mannoprotein.                                                                                                  | 2 |
| <i>YKL093W</i> | <i>MBR1</i>   | Protein involved in mitochondrial functions and stress response.                                                         | 1 |
| <i>YER080W</i> | <i>AIM9</i>   | Putative protein of unknown function.                                                                                    | 1 |
| <i>YPL177C</i> | <i>CUP9</i>   | Homeodomain-containing transcriptional repressor of PTR2.                                                                | 2 |
